# Supplementary material for: Effluent of biomass cooking with active oxygen and solid alkali (CAOSA): component separation, recovery and characterization
Source: Royal Society of Chemistry journal article supplement (doi:10.1039/d0ra01225d), 2020-01-01
Supplement: d0ra01225d1.pdf [file d0ra01225d1.pdf]

## Supplementary Information

### Effluent of Cooking with Active Oxygen and Solid Alkali (CAOSA): Components Separation, Recovery and Characterization

Ning Ding<sup>a</sup>, Huai Liu<sup>a</sup>, Xianhai Zeng<sup>\*ab</sup>, Yong Sun<sup>ab</sup>, Xing Tang<sup>ab</sup>, Lu Lin<sup>\*ab</sup>

<sup>a</sup> College of Energy, Xiamen University, Xiamen 361102, PR China.

<sup>b</sup> Fujian Engineering and Research Center of Clean and High-valued Technologies for Biomass; Xiamen Key Laboratory of Clean and High-valued Applications of Biomass; Xiamen University, Xiamen 361102, PR China.

\* Corresponding Authors:

Xianhai Zeng: Tel/Fax: +86-592-2880701; Email: [xianhai.zeng@xmu.edu.cn](mailto:xianhai.zeng@xmu.edu.cn).

Lu Lin: Tel/Fax: +86-592-2880702, Email: [lulin@xmu.edu.cn](mailto:lulin@xmu.edu.cn).

## S1. Figures

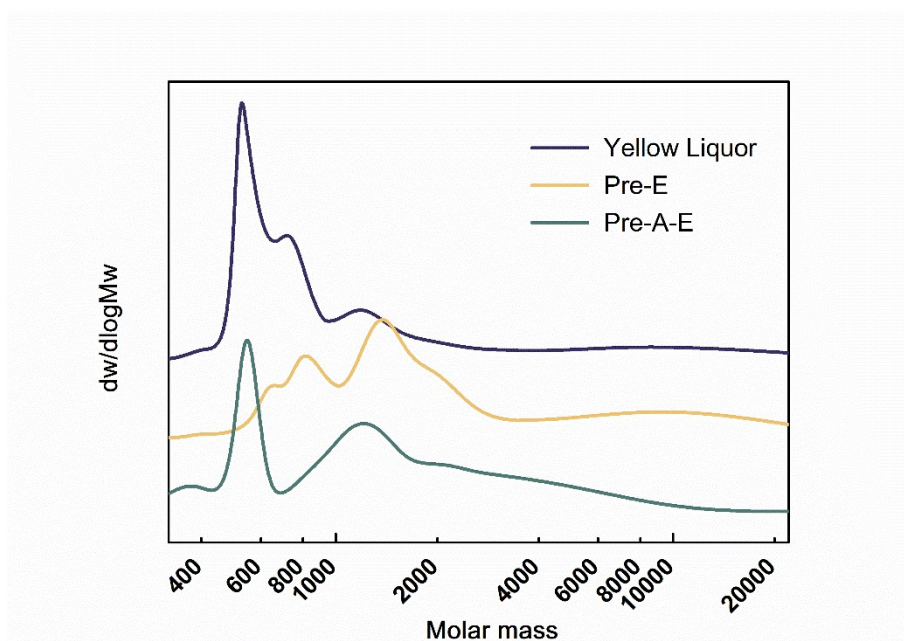

Figure S1 GPC results of YL/Pre-E/Pre-A-E

## S2. Tables

**Table S1 Dry components and precipitates in YL**

| Entry   | Dry components in<br>YL/% | Precipitates in YL dry components/% |         |       |         |
|---------|---------------------------|-------------------------------------|---------|-------|---------|
|         |                           | Pre-E                               | Pre-E-A | Pre-A | Pre-A-E |
| 1       | 10.52                     | 82.83                               | 1.59    | 15.55 | 4.31    |
| 2       | 11.13                     | 81.77                               | 1.66    | 15.47 | 4.23    |
| 3       | 10.73                     | 81.36                               | 1.81    | 15.49 | 4.33    |
| 4       | 10.99                     | 81.64                               | 1.73    | 15.44 | 4.34    |
| 5       | 10.39                     | 81.73                               | 1.81    | 15.41 | 4.28    |
| Average | 10.75                     | 81.87                               | 1.72    | 15.47 | 4.30    |

**Table S2 Ash contents of YL dry components and precipitates**

| Entry   | Ash content/% |       |         |       |         |
|---------|---------------|-------|---------|-------|---------|
|         | YL            | Pre-E | Pre-E-A | Pre-A | Pre-A-E |
| 1       | 25.23         | 27.03 | 3.35    | 1.63  | 0.81    |
| 2       | 25.77         | 27.58 | 3.78    | 1.64  | 0.88    |
| 3       | 25.06         | 28.21 | 3.82    | 1.7   | 0.84    |
| Average | 25.35         | 27.61 | 3.65    | 1.66  | 0.84    |

**Table S3 Assignments of main  $^{13}\text{C}$ - $^1\text{H}$  cross-signals in the HSQC spectra of****MWL**

| Label                         | $\delta_{\text{C}}/\delta_{\text{H}}$ (ppm) | Assignments                                                                                  |
|-------------------------------|---------------------------------------------|----------------------------------------------------------------------------------------------|
| $\text{C}_{\beta}$            | 53.1/3.46                                   | $\text{C}_{\beta}$ - $\text{H}_{\beta}$ in phenylcoumaran (C)                                |
| $\text{B}_{\beta}$            | 53.5/3.07                                   | $\text{C}_{\beta}$ - $\text{H}_{\beta}$ in $\beta$ - $\beta$ (resinol) (B)                   |
| $\text{OCH}_3$                | 56.4/3.70                                   | C-H in methoxyls                                                                             |
| $\text{A}_{\gamma}$           | 59.9/3.35-3.80                              | $\text{C}_{\gamma}$ - $\text{H}_{\gamma}$ in $\beta$ -O-4 substructures (A)                  |
| $\text{A}'_{\gamma}$          | 63.0/4.36                                   | $\text{C}_{\gamma}$ - $\text{H}_{\gamma}$ in $\gamma$ -acylated $\beta$ -O-4 ( $\text{A}'$ ) |
| $\text{C}_{\gamma}$           | 62.2/3.76                                   | $\text{C}_{\gamma}$ - $\text{H}_{\gamma}$ in phenylcoumaran (C)                              |
| $\text{B}_{\gamma}$           | 71.2/3.82-4.18                              | $\text{C}_{\gamma}$ - $\text{H}_{\gamma}$ in $\beta$ - $\beta$ (resinol) (B)                 |
| $\text{A}_{\alpha}$           | 71.8/4.86                                   | $\text{C}_{\alpha}$ - $\text{H}_{\alpha}$ in $\beta$ -O-4 unit (A)                           |
| $\text{A}_{\beta}(\text{G})$  | 83.4/4.38                                   | $\text{C}_{\beta}$ - $\text{H}_{\beta}$ in $\beta$ -O-4 linked to G (A)                      |
| $\text{B}_{\alpha}$           | 84.8/4.66                                   | $\text{C}_{\alpha}$ - $\text{H}_{\alpha}$ in $\beta$ - $\beta$ (resinol) (B)                 |
| $\text{A}'_{\beta}(\text{G})$ | 80.8/4.52                                   | $\text{C}_{\beta}$ - $\text{H}_{\beta}$ in $\beta$ -O-4 linked to G ( $\text{A}'$ )          |
| $\text{A}_{\beta}(\text{S})$  | 85.8/4.12                                   | $\text{C}_{\beta}$ - $\text{H}_{\beta}$ in $\beta$ -O-4 linked to S (A)                      |
| $\text{C}_{\alpha}$           | 86.8/5.45                                   | $\text{C}_{\alpha}$ - $\text{H}_{\alpha}$ in phenylcoumaran (C)                              |
| $\text{T}'_{2,6}$             | 103.9/7.34                                  | $\text{C}'_{2,6}$ - $\text{H}'_{2,6}$ in triclin (T)                                         |
| $\text{T}_6$                  | 98.9/6.23                                   | $\text{C}_{2,6}$ - $\text{H}_{2,6}$ in triclin (T)                                           |
| $\text{T}_8$                  | 94.2/6.60                                   | $\text{C}_8$ - $\text{H}_8$ in triclin (T)                                                   |
| $\text{T}_3$                  | 106.2/7.07                                  | $\text{C}_3$ - $\text{H}_3$ in triclin (T)                                                   |
| $\text{S}_{2,6}$              | 103.9/6.70                                  | $\text{C}_{2,6}$ - $\text{H}_{2,6}$ in syringyl unit (S)                                     |
| $\text{S}'_{2,6}$             | 106.3/7.32                                  | $\text{C}_{2,6}$ - $\text{H}_{2,6}$ in oxidized S unit (S)                                   |
| $\text{G}_2$                  | 110.8/6.97                                  | $\text{C}_2$ - $\text{H}_2$ in guaiacyl unit (G)                                             |
| $\text{G}_5$                  | 114.5/6.70                                  | $\text{C}_5$ - $\text{H}_5$ in guaiacyl unit (G)                                             |
| $\text{G}_6$                  | 119.0/6.78                                  | $\text{C}_6$ - $\text{H}_6$ in guaiacyl unit (G)                                             |
| $\text{H}_{2,6}$              | 127.7/7.17                                  | $\text{C}_{2,6}$ - $\text{H}_{2,6}$ in p-hydroxyphenyl unit<br>(H)                           |
| $\text{PCE}_{3,5}$            | 115.6/6.77                                  | $\text{C}_{3,5}$ - $\text{H}_{3,5}$ in p-Coumarates (PCE)                                    |
| $\text{PCE}_{2,6}$            | 130.2/7.48                                  | $\text{C}_{2,6}$ - $\text{H}_{2,6}$ in p-Coumarates (PCE)                                    |

|                  |            |                                                      |
|------------------|------------|------------------------------------------------------|
| PCE <sub>7</sub> | 144.8/7.51 | C <sub>7</sub> -H <sub>7</sub> in p-Coumarates (PCE) |
| PCE <sub>8</sub> | 113.7/6.24 | C <sub>8</sub> -H <sub>8</sub> in p-Coumarates (PCE) |
| FA <sub>2</sub>  | 110.7/7.35 | C <sub>2</sub> -H <sub>2</sub> in p-Ferulate (FA)    |
| FA <sub>6</sub>  | 123.1/7.20 | C <sub>6</sub> -H <sub>6</sub> in p-Ferulate (FA)    |
| FA <sub>7</sub>  | 144.8/7.51 | C <sub>7</sub> -H <sub>7</sub> in p-Ferulate (FA)    |

---

**Table S4 Band assignment of lignin in FTIR spectra**

| Entry | Wavenumber(cm <sup>-1</sup> ) | Functional group                                                                                                                              |
|-------|-------------------------------|-----------------------------------------------------------------------------------------------------------------------------------------------|
| 1     | 3412-3460                     | O-H stretch                                                                                                                                   |
| 2     | 3000-2842                     | C-H stretch in methyl and methylene groups                                                                                                    |
| 3     | 2900                          | C-H aliphatic axial deformation                                                                                                               |
| 4     | 2865                          | C-H of methoxy group                                                                                                                          |
| 5     | 1738-1709                     | C=O stretch in unconjugated ketone, carbonyl and in ester groups; conjugated aldehydes and carboxylic acids absorb around and below 1700 cm-1 |
| 6     | 1655-1675                     | C=O stretch ; in conjugated p-subst. aryl ketones; strong electronegative substituents lower the wavenumber                                   |
| 7     | 1593-1605                     | aromatic skeletal vibrations plus C=O stretch; S > G; G condensed > G etherified                                                              |
| 8     | 1505-1515                     | aromatic skeletal vibrations; G > S                                                                                                           |
| 9     | 1460-1470                     | C-H deformations; asym. in -CH3 and -CH2-                                                                                                     |
| 10    | 1422-1430                     | aromatic skeletal vibrations combined with C-H in-plane deform                                                                                |
| 11    | 1365-1370                     | aliphatic C-H stretch in CH3, not in OMe; phen. OH                                                                                            |
| 12    | 1325-1330                     | S ring plus G ring condensed                                                                                                                  |
| 13    | 1266-1270                     | G ring plus C=O stretch                                                                                                                       |
| 14    | 1221-1230                     | C-C plus C-O plus C=O stretch; G condensed > G etherified                                                                                     |
| 15    | 1166                          | typical for HGS lignins; C=O in ester groups (conj.)                                                                                          |
| 16    | 1140                          | aromatic C-H in-plane deformation; typical for G units; whereby G condensed > etherified (typical                                             |

|    |           |                                                                      |
|----|-----------|----------------------------------------------------------------------|
|    |           | for S units); plus secondary alcohol plus C=O stretch                |
| 17 | 1086      | C-O deformation in secondary alcohols and aliphatics ethers          |
|    |           | aromatic C-H in-plane deformation, G > S; plus                       |
| 18 | 1030-1035 | C-O deform, in primary alcohols; plus C=O stretch (conj.)            |
| 19 | 966-990   | -CH=CH- out-of-plane deform                                          |
| 20 | 915-925   | C-H out-of-plane; aromatic                                           |
| 21 | 853-858   | C-H out-of-plane in position 2,5, and 6 of G units                   |
| 22 | 834-835   | C-H out-of-plane in position 2,6 of S and in all position of H units |
| 23 | 817-832   | C-H out-of-plane in positions 2,5 and 6 of G units                   |

---
